# Supplementary material for: Rapid Determination of Selected PFAS in Textiles Entering the Waste Stream
Source: MDPI journal article supplement (doi:10.3390/toxics11010055), 2023-01-06
Supplement: s1 [file s1]

**Table S1. monitoring ions (+/- 50 ppm) of PFAS targeted in this study and their respective internal standards.**

| <b>Compound</b> | <b>m/z</b> | <b>Internal Standard</b> | <b>m/z</b> |
|-----------------|------------|--------------------------|------------|
| <b>PFBS</b>     | 298.94299  | <b>MPFBS</b>             | 301.95306  |
| <b>PFHxS</b>    | 398.93660  | <b>MPFHxS</b>            | 402.94509  |
| <b>PFHpS</b>    | 448.93341  | <b>M8PFOS</b>            | 506.95706  |
| <b>PFOS</b>     | 498.93022  | <b>M8PFOS</b>            | 506.95706  |
| <b>PFNS</b>     | 548.92702  | <b>M8PFOS</b>            | 506.95706  |
| <b>PFDS</b>     | 598.92383  | <b>M8PFOS</b>            | 506.95706  |
| <b>PFPeA</b>    | 218.98618  | <b>MPFPeA</b>            | 222.99959  |
| <b>PFHxA</b>    | 312.97281  | <b>M5PFHxA</b>           | 317.98959  |
| <b>PFHpA</b>    | 318.97979  | <b>MPFHpA</b>            | 322.99321  |
| <b>PFOA</b>     | 412.96642  | <b>M8PFOA</b>            | 420.99326  |
| <b>PFNA</b>     | 462.96323  | <b>M9PFNA</b>            | 471.99343  |
| <b>PFDA</b>     | 468.97021  | <b>MPFDA</b>             | 474.99034  |
| <b>PFUdA</b>    | 562.95684  | <b>MPFUdA</b>            | 569.98033  |
| <b>PFDoA</b>    | 612.95365  | <b>MPFDoA</b>            | 614.96036  |
| <b>PFTTrDA</b>  | 662.95046  | <b>MPFTeDA</b>           | 670.96414  |
| <b>PFTeDA</b>   | 712.94726  | <b>MPFTeDA</b>           | 670.96414  |
| <b>FOSA</b>     | 496.93837  | <b>M8FOSA</b>            | 504.96521  |
| <b>MeFOSA</b>   | 511.96185  | <b>d3-MeFOSA</b>         | 514.98068  |
| <b>MeFOSE</b>   | 600.98572  | <b>d7-MeFOSE</b>         | 608.09658  |
| <b>EtFOSA</b>   | 525.9775   | <b>d3-MeFOSA</b>         | 514.98068  |
| <b>EtFOSE</b>   | 616.00919  | <b>d7-MeFOSE</b>         | 608.09658  |

**Table S2. Method LODs (pg/ $\mu$ L) and LOQs (mg/kg) for all target PFAS in this study**

| <b>Compound</b> | <b>LOD<br/>(pg/<math>\mu</math>L)</b> | <b>LOQ<br/>(mg/kg)</b> |
|-----------------|---------------------------------------|------------------------|
| <b>PFUdA</b>    | 1.2                                   | 0.2                    |
| <b>PFBS</b>     | 0.6                                   | 0.1                    |
| <b>PFDA</b>     | 0.6                                   | 0.1                    |
| <b>PFDoA</b>    | 1.2                                   | 0.2                    |
| <b>PFDS</b>     | 0.6                                   | 0.1                    |
| <b>PFHpA</b>    | 0.6                                   | 0.1                    |
| <b>PFHpS</b>    | 0.6                                   | 0.1                    |
| <b>PFHxA</b>    | 0.6                                   | 0.1                    |
| <b>PFHxS</b>    | 0.6                                   | 0.1                    |
| <b>PFNA</b>     | 0.6                                   | 0.1                    |
| <b>PFNS</b>     | 0.6                                   | 0.1                    |
| <b>PFOA</b>     | 0.6                                   | 0.1                    |
| <b>PFOS</b>     | 0.6                                   | 0.1                    |
| <b>PFPeA</b>    | 2.4                                   | 0.4                    |
| <b>PFTeDA</b>   | 1.2                                   | 0.2                    |
| <b>PFTTrDA</b>  | 1.2                                   | 0.2                    |
| <b>EtFOSA</b>   | 1.2                                   | 0.2                    |
| <b>EtFOSE</b>   | 1.2                                   | 0.2                    |
| <b>FOSA</b>     | 0.6                                   | 0.1                    |
| <b>MeFOSA</b>   | 1.2                                   | 0.2                    |
| <b>MeFOSE</b>   | 1.2                                   | 0.2                    |

F-Ca-2-D7-MeFOSE (Unknown) 609.0099 - 609.0710 - D:\AnalystData\Projects\PFASData\SD\SAFER\WAFER\_21\WAFER\_007.wiff (sa...  
Area: 2.239e4, Height: 1.946e3, RT: 5.99 min

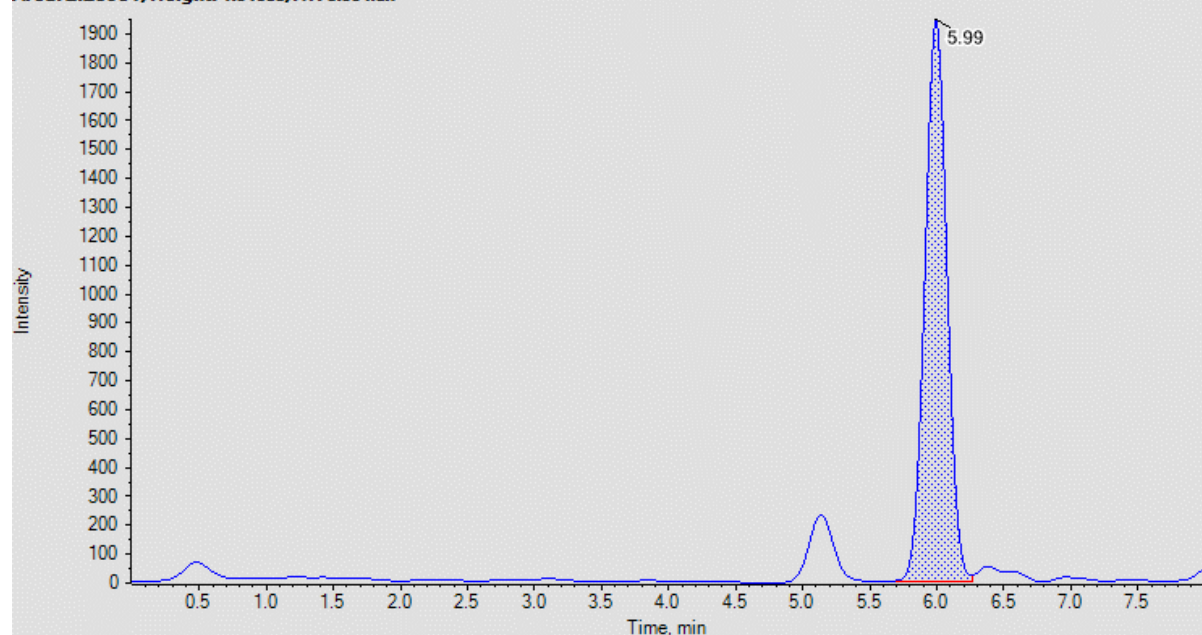

F-Ca-2-D-MeFOSE (Unknown) 514.9570 - 515.0084 - D:\AnalystData\Projects\PFASData\SD\SAFER\WAFER\_21\WAFER\_007.wiff (sa...  
Area: 6.288e5, Height: 5.393e4, RT: 6.00 min

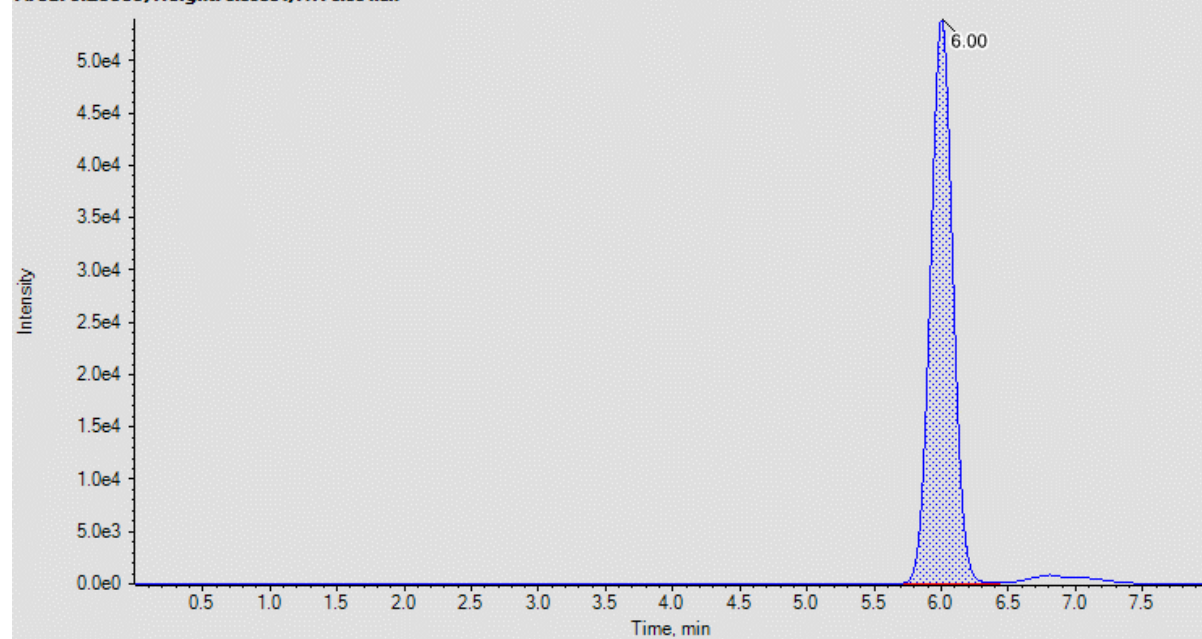

F-Ca-2 - M2PFTeDA (Unknown) 714.9165 - 714.9880 - D:\AnalystData\Projects\PFASData\DS\ISAFER\WAFER\_21\WAFER\_007.wiff (sa...  
Area: 4.258e5, Height: 6.716e4, RT: 5.91 min

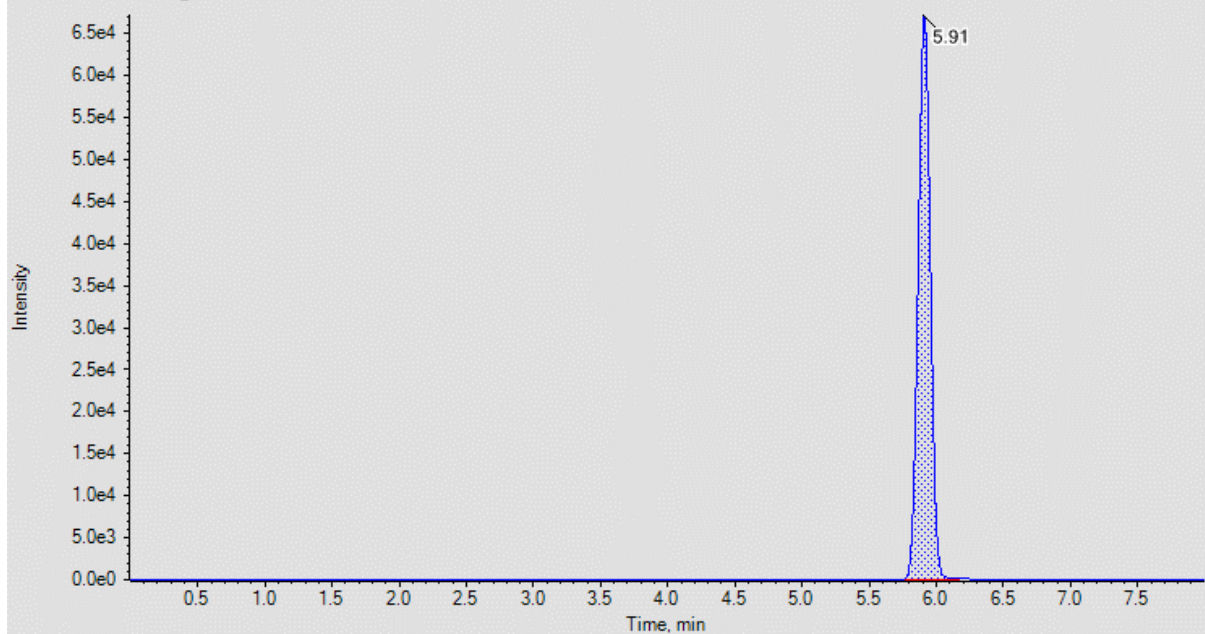

F-Ca-2 - M4PFHpA (Unknown) 321.9718 - 322.0040 - D:\AnalystData\Projects\PFASData\DS\ISAFER\WAFER\_21\WAFER\_007.wiff (sam...  
Area: 1.179e5, Height: 1.109e4, RT: 4.01 min

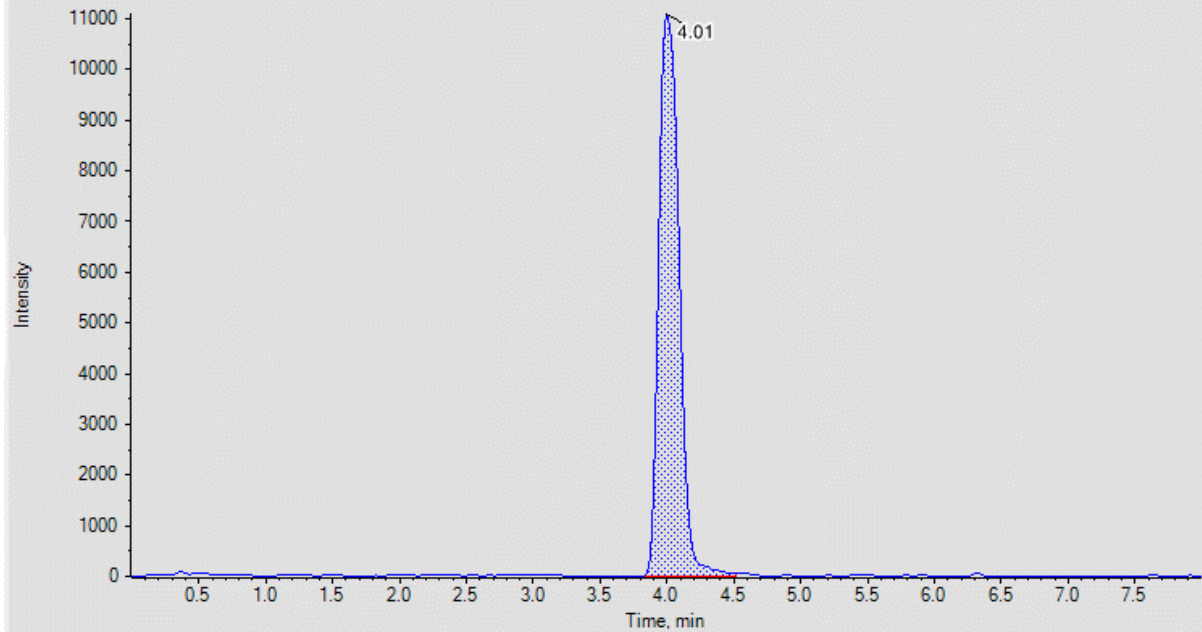

F-Ca-2 - M5PFPeA (Unknown) 222.9889 - 223.0112 - D:\AnalystData\Projects\PFASData\SD\SAFER\WAFER\_21\WAFER\_007.wiff (sam...  
Area: 4.266e4, Height: 3.080e3, RT: 2.08 min

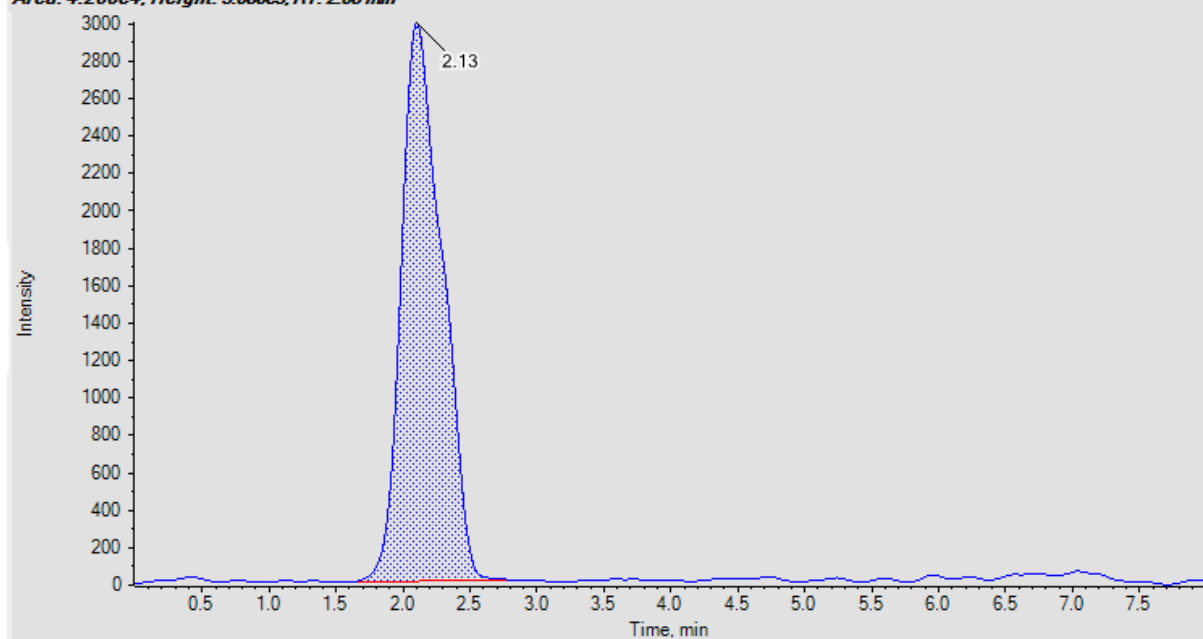

F-Ca-2 - M6PFDA (Unknown) 473.9586 - 474.0059 - D:\AnalystData\Projects\PFASData\SD\SAFER\WAFER\_21\WAFER\_007.wiff (sampl...  
Area: 7.514e4, Height: 9.940e3, RT: 5.14 min

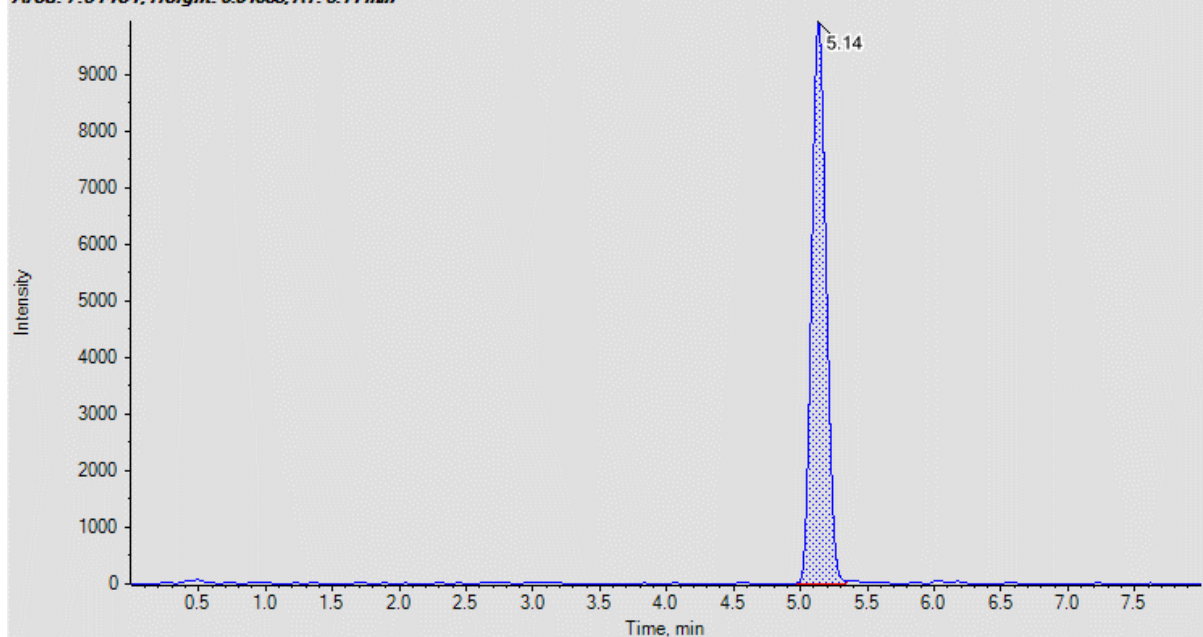

F-Ca-2-M7PFUdA (Unknown) 569.9494 - 570.0064 - D:\AnalystData\Projects\PFASData\DS\ISAFER\WAFER\_21\WAFER\_007.wiff (sam...  
Area: 4.493e5, Height: 3.326e4, RT: 5.39 min

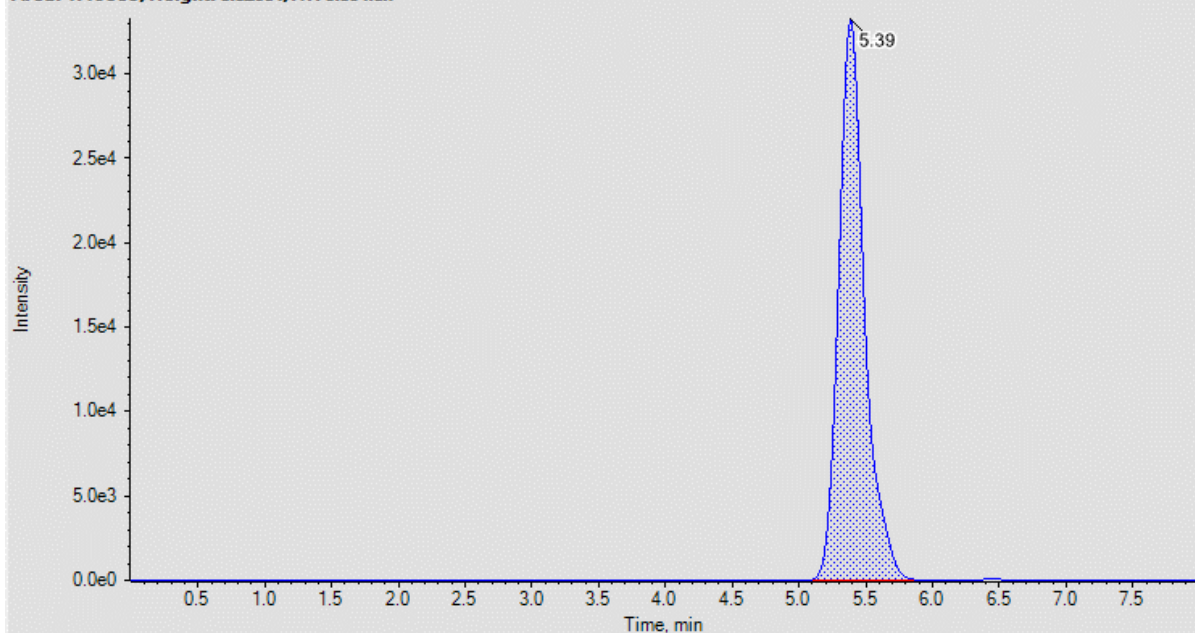

F-Ca-2-M8FOSA (Unknown) 505.9493 - 505.9999 - D:\AnalystData\Projects\PFASData\DS\ISAFER\WAFER\_21\WAFER\_007.wiff (sampl...  
Area: 6.035e5, Height: 5.020e4, RT: 5.60 min

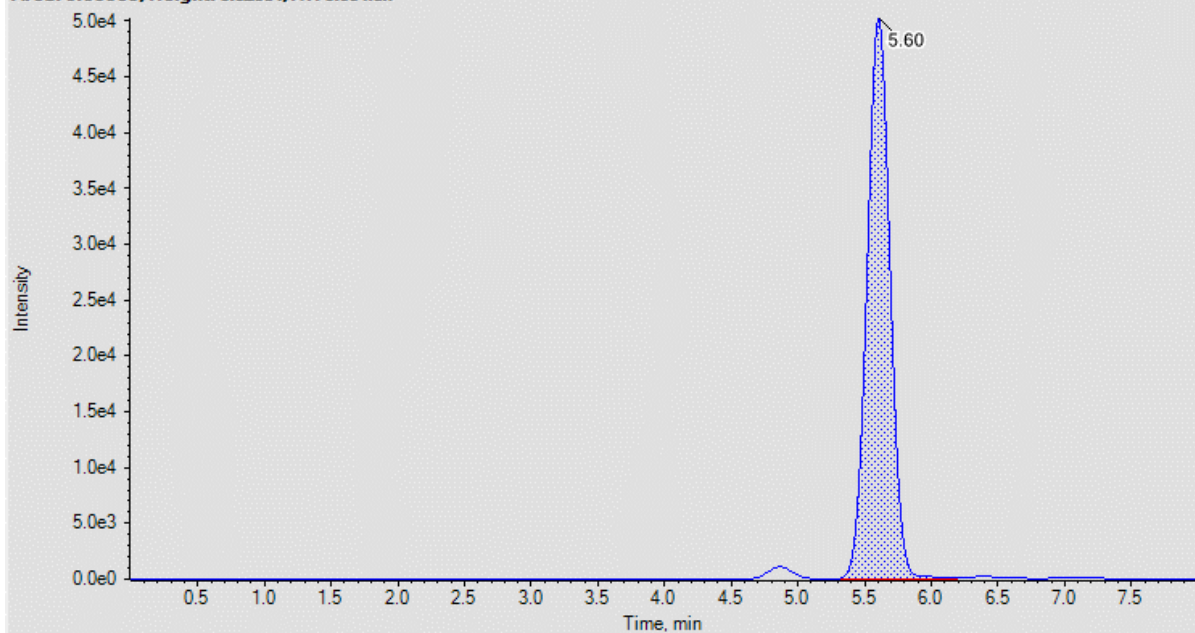

F-Ca-2-M8PFOA (Unknown) 420.9736 - 421.0156 - D:\AnalystData\Projects\VPFAS\Data\DS\ISAFER\WAFER\_21\WAFER\_007.wiff (sampl...  
Area: 2.636e5, Height: 2.471e4, RT: 4.48 min

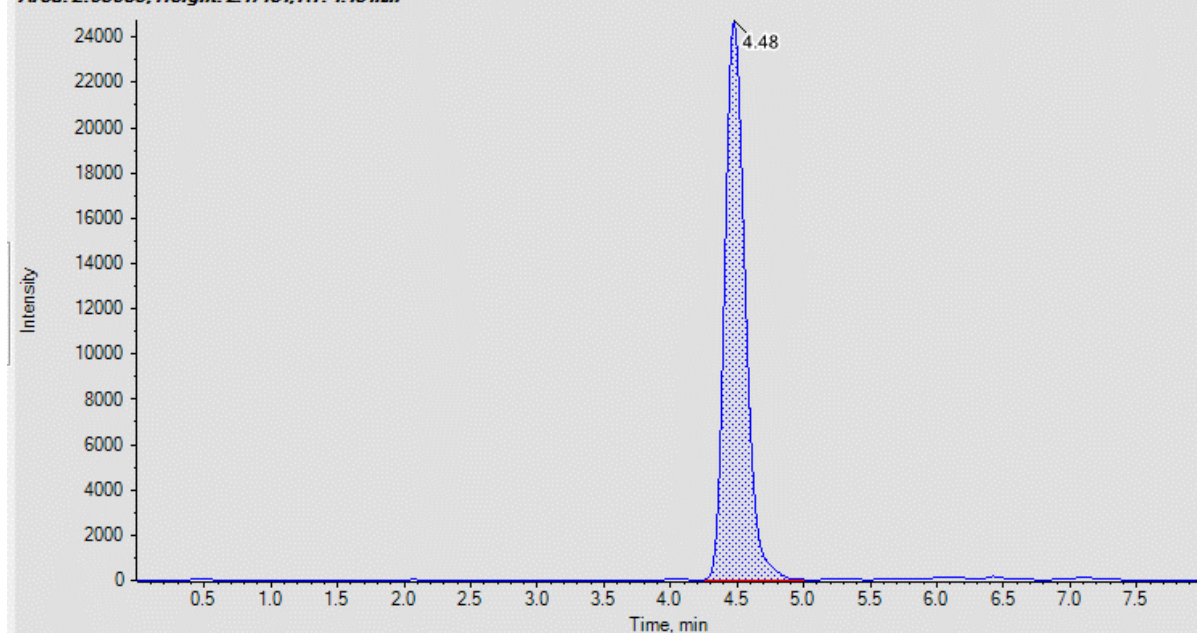

F-Ca-2-M8PFOA (Unknown) 506.9342 - 506.9849 - D:\AnalystData\Projects\VPFAS\Data\DS\ISAFER\WAFER\_21\WAFER\_007.wiff (sampl...  
Area: 3.988e5, Height: 4.357e4, RT: 4.86 min

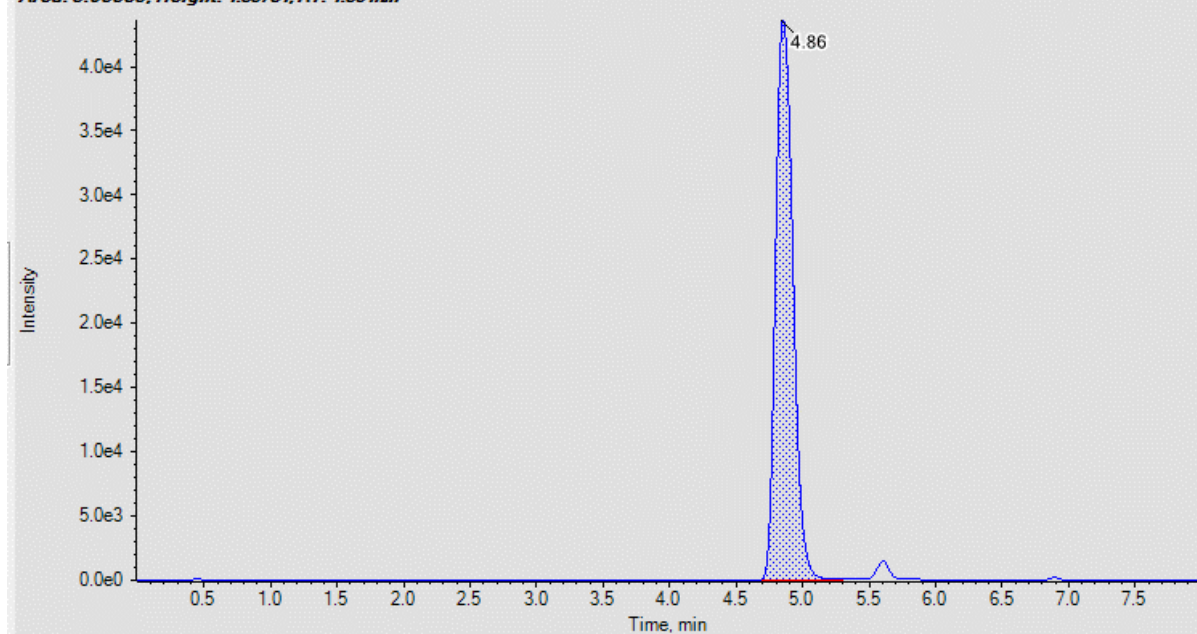

F-Ca-2 - MPFBS (Unknown) 301.9395 - 301.9697 - D:\AnalystData\Projects\IPFAS\Data\DS\ISAFER\WAFER\_21\WAFER\_007.wiff (sample...  
Area: 2.348e5, Height: 1.780e4, RT: 2.64 min

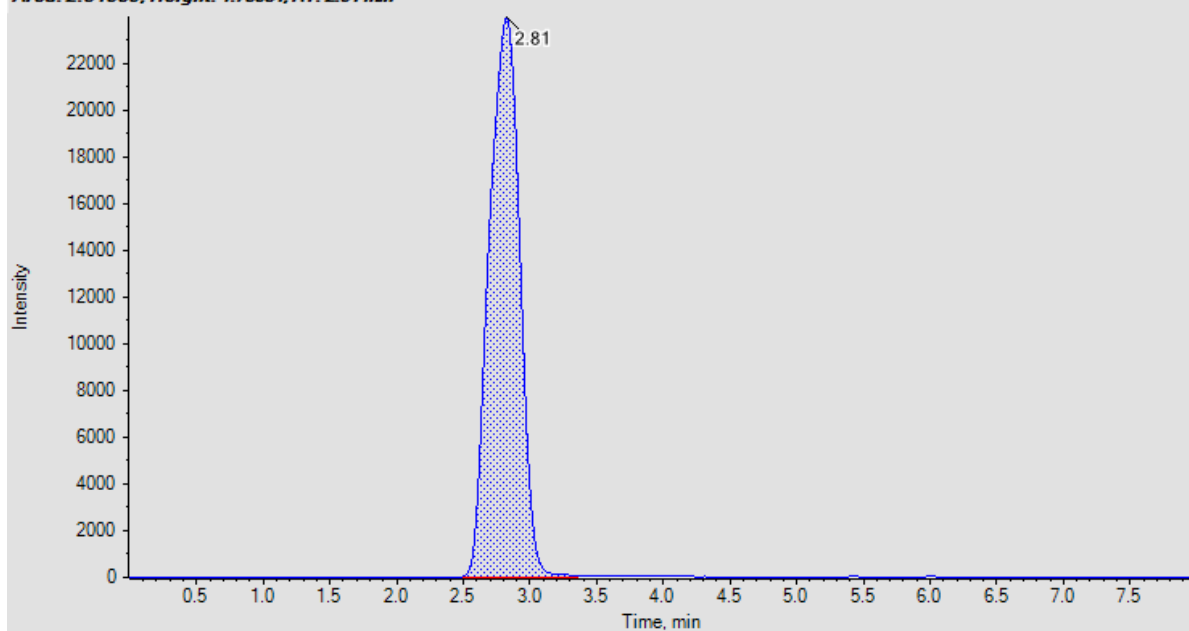

F-Ca-2 - MPFDoA (Unknown) 614.9272 - 614.9887 - D:\AnalystData\Projects\IPFAS\Data\DS\ISAFER\WAFER\_21\WAFER\_007.wiff (sample...  
Area: 4.383e5, Height: 5.417e4, RT: 5.59 min

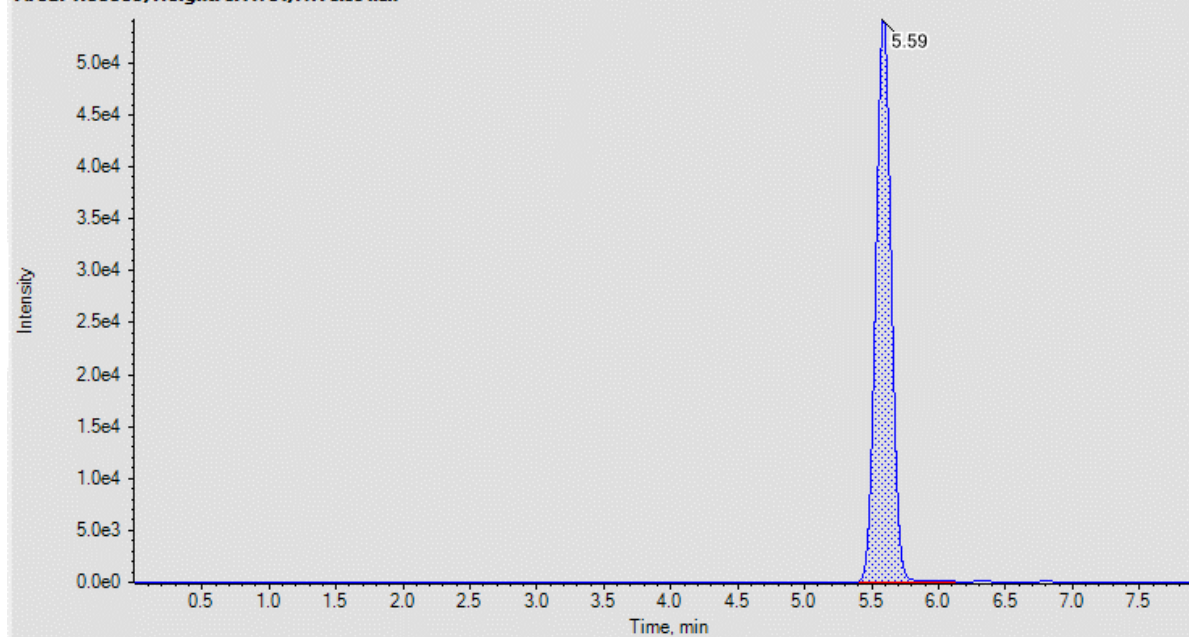

**F-Ca-2-MPFHxA (Unknown) 269.9700 - 269.9970 - D:\AnalystData\Projects\PFASData\DS1\SAFER\WAFER\_21\WAFER\_007.wiff (sampl...**  
**Area: 1.218e5, Height: 8.641e3, RT: 3.34 min**

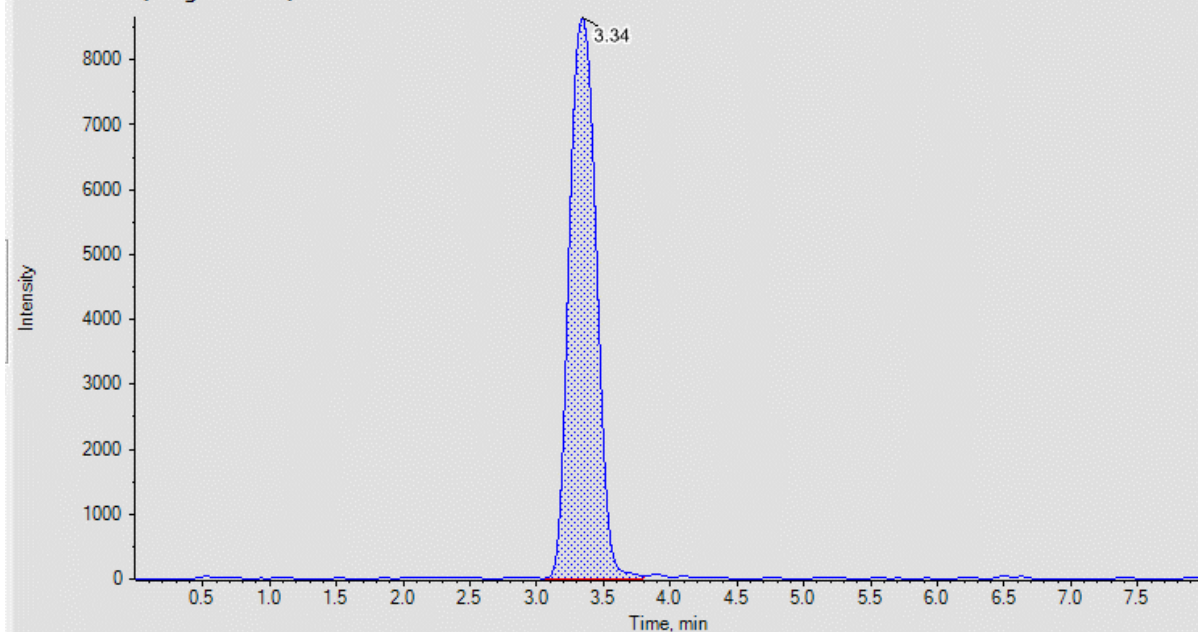

**F-Ca-2-MPFHxS (Unknown) 402.9262 - 402.9664 - D:\AnalystData\Projects\PFASData\DS1\SAFER\WAFER\_21\WAFER\_007.wiff (sampl...**  
**Area: 3.710e5, Height: 3.139e4, RT: 4.08 min**

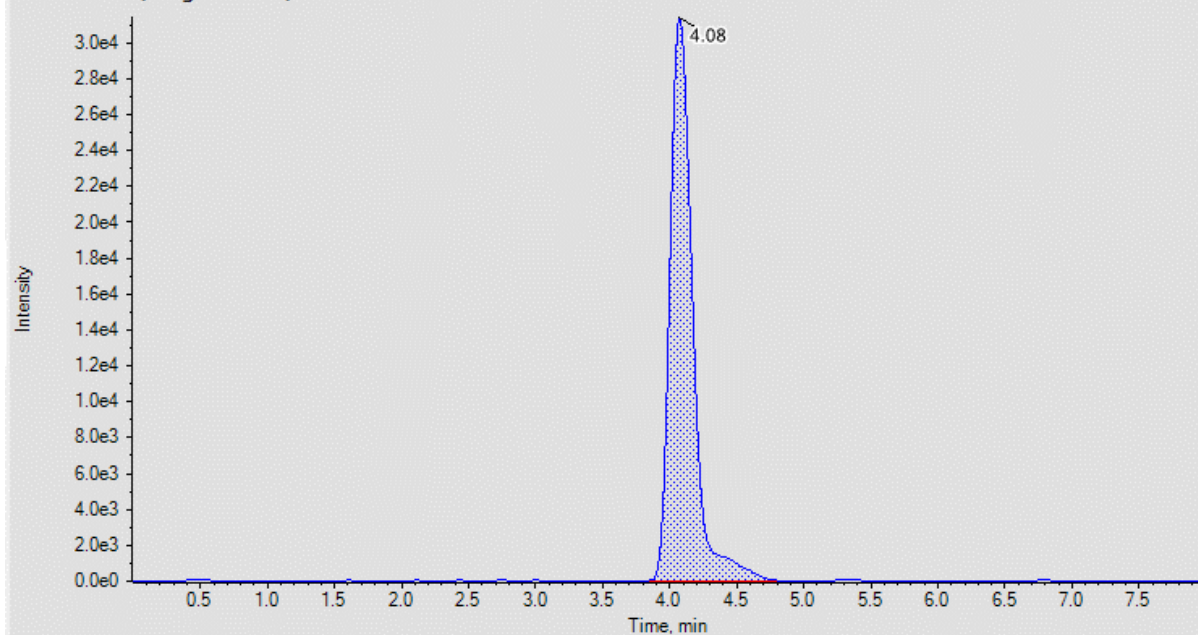

F-Ca-2-MPFNA (Unknown) 467.9585-468.0053 - D:\AnalystData\Projects\VPFASData\DS1\SAFER\WAFER\_21\WAFER\_007.wiff (sample...  
Area: 3.290e5, Height: 3.301e4, RT: 4.85 min

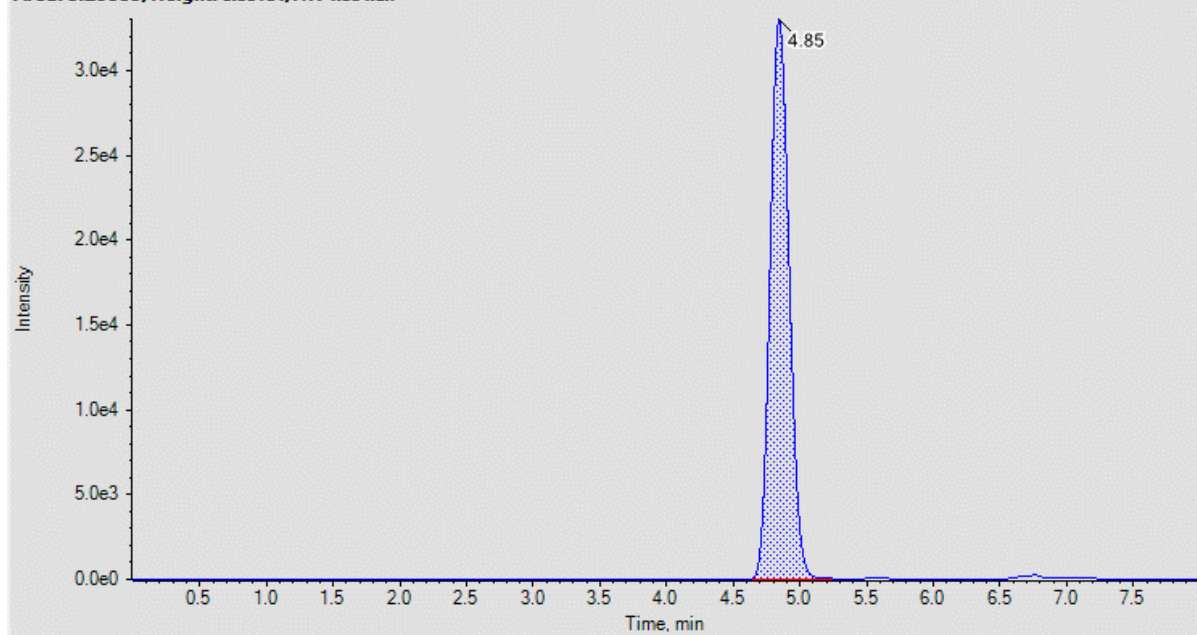

Figure S1. Internal standard chromatograms from a typical sample.
